# Supplementary material for: Driving factors of aerosol acidity: a new hierarchical quantitative analysis framework and its application in Changzhou, China
Source: Copernicus journal article supplement (doi:10.5194/egusphere-2024-3584), 2024-11-29
Supplement: Supplementary file 1 [file egusphere-2024-3584-supplement.pdf]

*Supplement of*

## **Driving factors of aerosol acidity: a new hierarchical quantitative analysis framework and its application in Changzhou, China**

Xiaolin Duan<sup>1,#</sup>, Guangjie Zheng<sup>1,#,\*</sup>, Chuchu Chen<sup>1,\*</sup>, Qiang Zhang<sup>2,\*</sup>, Kebin He<sup>1</sup>

<sup>1</sup> State Key Joint Laboratory of Environmental Simulation and Pollution Control, School of Environment, Tsinghua University, Beijing 100084, China

<sup>2</sup> Ministry of Education Key Laboratory for Earth System Modeling, Department of Earth System Science, Tsinghua University, Beijing, China.

# These authors contributed equally.

*Correspondence to:* G. Zheng ([zgj123@mail.tsinghua.edu.cn](mailto:zgj123@mail.tsinghua.edu.cn)); C. Chen ([chenc3@mail.tsinghua.edu.cn](mailto:chenc3@mail.tsinghua.edu.cn)); Q. Zhang ([qiangzhang@tsinghua.edu.cn](mailto:qiangzhang@tsinghua.edu.cn))

This 13-pages PDF file contains:

- Supplementary Texts S1-S2
- Figures S1-S10

## Supplementary Text

### S1. Detailed description of variation contribution quantification

To illustrate the one-at-a-time sensitivity analysis method, driving factor analysis of  $c_{ni}$  variations is taken for example here. The  $c_{ni}$  depends mainly on RH, temperature  $T$  and the fraction of  $\text{NO}_3^-$  in anions ( $f_{\text{NO}_3^-}$ ) (Zheng et al., 2022a). Based on the calculation method of previous study<sup>19</sup> and ISORROPIA model, these influencing factors contributions to  $c_{ni}$  variations can be quantitative analyzed by Eqs.S1 as:

$$\partial c_{ni} / \partial_{RH} = c_{ni}(\text{RH}, \bar{T}, \overline{f_{\text{NO}_3^-}}) - c_{ni}(\overline{\text{RH}}, \bar{T}, \overline{f_{\text{NO}_3^-}}) \quad (\text{S1a})$$

$$\partial c_{ni} / \partial_{f_{\text{NO}_3^-}} = c_{ni}(\overline{\text{RH}}, \bar{T}, f_{\text{NO}_3^-}) - c_{ni}(\overline{\text{RH}}, \bar{T}, \overline{f_{\text{NO}_3^-}}) \quad (\text{S1b})$$

$$\partial c_{ni} / \partial_T = \partial c_{ni} - \partial c_{ni} / \partial_{f_{\text{NO}_3^-}} - \partial c_{ni} / \partial_{RH} \quad (\text{S1c})$$

where  $\bar{X}$  and  $X$  are the average values and decomposed values of variable  $X$ , respectively, and more detailed calculations are described in SI Text S2.

### S2. Detailed descriptions of quantitative analysis of each factor based on ISM and time series analysis

Here we adopted a bottom-up method to quantify the time series components of upper-level factors in the ISM model and its driving factors. That is, based on the decomposition of time series analysis, each input parameter  $p$  in ISORROPIA v2.3 is subdivided into 4 time series components. For example, temperature can be decomposed into long-term trend ( $T_{\text{yr}}$ ), seasonal variations ( $T_{\text{seas}}$ ), diurnal cycles ( $T_{\text{day}}$ ) and residuals ( $T_{\text{res}}$ ), respectively. Then, the corresponding components are used in ISORROPIA calculations to achieve the quantitative assessment of factors affecting pH at corresponding time series.

Taking factors contribution to  $X_{gp}$  seasonal variations for example, there are two parts for calculation:

$\partial X_{gp}|_{\text{seas}}$  and factor  $x_i$  contribution to  $\partial X_{gp}|_{\text{seas}}$  (i.e.,  $\partial X_{gp} / \partial x_i |_{\text{seas}}$ )

#### (1) Calculation of $X_{gp}$ seasonal variations $\partial X_{gp}|_{\text{seas}}$

In the seasonal variation's scenario, values of input parameter  $p$  is (Eq. S2a)

$$p = \bar{p} + p_{\text{seas}} \quad (\text{S2a})$$

where  $\bar{p}$  is the average values of  $p$  and  $p_{\text{seas}}$  is the decomposed seasonal values in time series analysis. Based on Eq. S2a, ISORROPIA v2.3 and Eq.2d in main text,  $X_{gp|\text{calc}}$  is obtained. Then  $\partial X_{gp}|_{\text{seas}}$  is calculate as (Eq. S2b)

$$\partial X_{gp}|_{seas} = X_{gp}|_{calc} - \overline{X_{gp}} \quad (S2b)$$

where  $\overline{X_{gp}}$  is obtained based on average values of input parameters.

## (2) Calculation of factor contributions $\partial X_{gp}/\partial x_i|_{seas}$

With the ISM in main text, main influence factors of  $X_{gp}$  are temperature and relative abundance of alkaline to acidic substances ( $C_t/A_t$ ). These factors variations contribute to  $\partial X_{gp}|_{seas}$  are obtained as follows:

$$\partial X_{gp}/\partial T|_{seas} = X_{gp}(T_{seas} + \bar{T}, \overline{C_t/A_t}) - X_{gp}(\bar{T}, \overline{C_t/A_t}) \quad (S2c)$$

$$\partial X_{gp}/\partial(C_t/A_t)|_{seas} = \partial X_{gp}|_{seas} - \partial X_{gp}/\partial T|_{seas} \quad (S2d)$$

where  $T_{seas}$  is the decomposed seasonal variations of temperature.  $\overline{C_t/A_t}$  is obtained based on the baseline values of input parameters. As for  $C_t/A_t$ , its contribution to  $\partial X_{gp}|_{seas}$  is the differences between  $\partial X_{gp}|_{seas}$  and  $\partial X_{gp}/\partial T|_{seas}$  (Eq. S2d), and this approach is also applicable to contribution of  $PM_{2.5}$  to AWC, temperature to  $c_{ni}$  and chemical profiles to  $f_{NO_3^-}$ . Then quantitative contributions of middle-level influencing factors for  $\partial X_{gp}|_{seas}$  are obtained. The contributions of middle-level factors to top-level influencing factors are calculated using a similar process for each time series component. Ultimately, the quantitative contributions of chemical profiles, RH, temperature and  $PM_{2.5}$  concentrations to pH are obtained for each time series component as well as for the entire observation period.

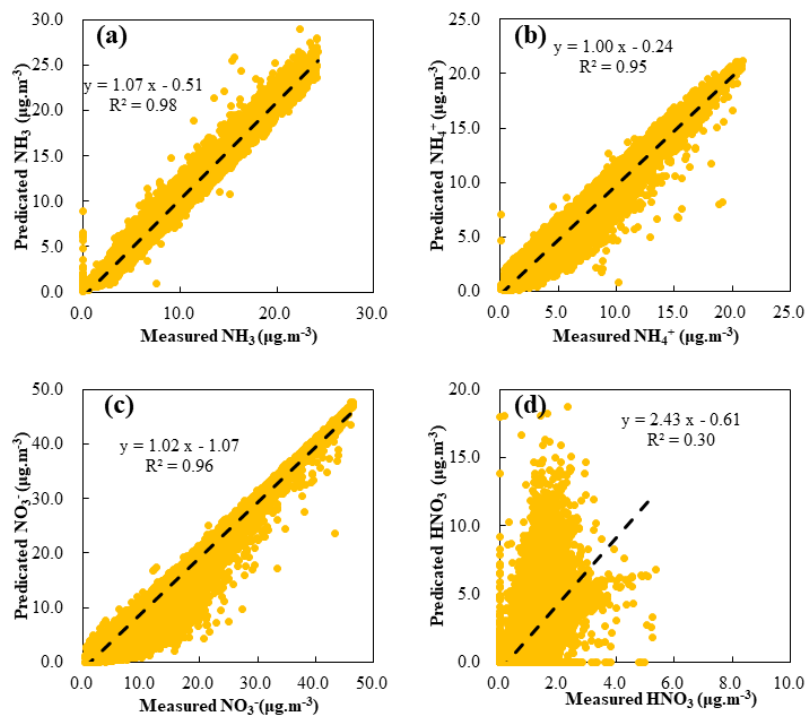

**Figure S1: Comparisons of predicted and measured (a)  $\text{NH}_3$ , (b)  $\text{NH}_4^+$ , (c)  $\text{NO}_3^-$ , and (d)  $\text{HNO}_3$  concentrations in Changzhou during 2018-2023.**

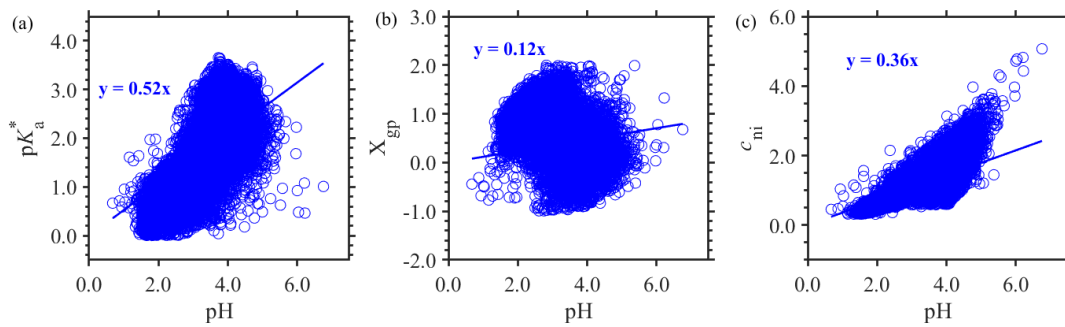

**Figure S2: Top-level decomposition of pH into (a)  $pK_a^*$ , (b)  $X_{gp}$  and (c)  $c_{ni}$  during the sampling period in Changzhou.**

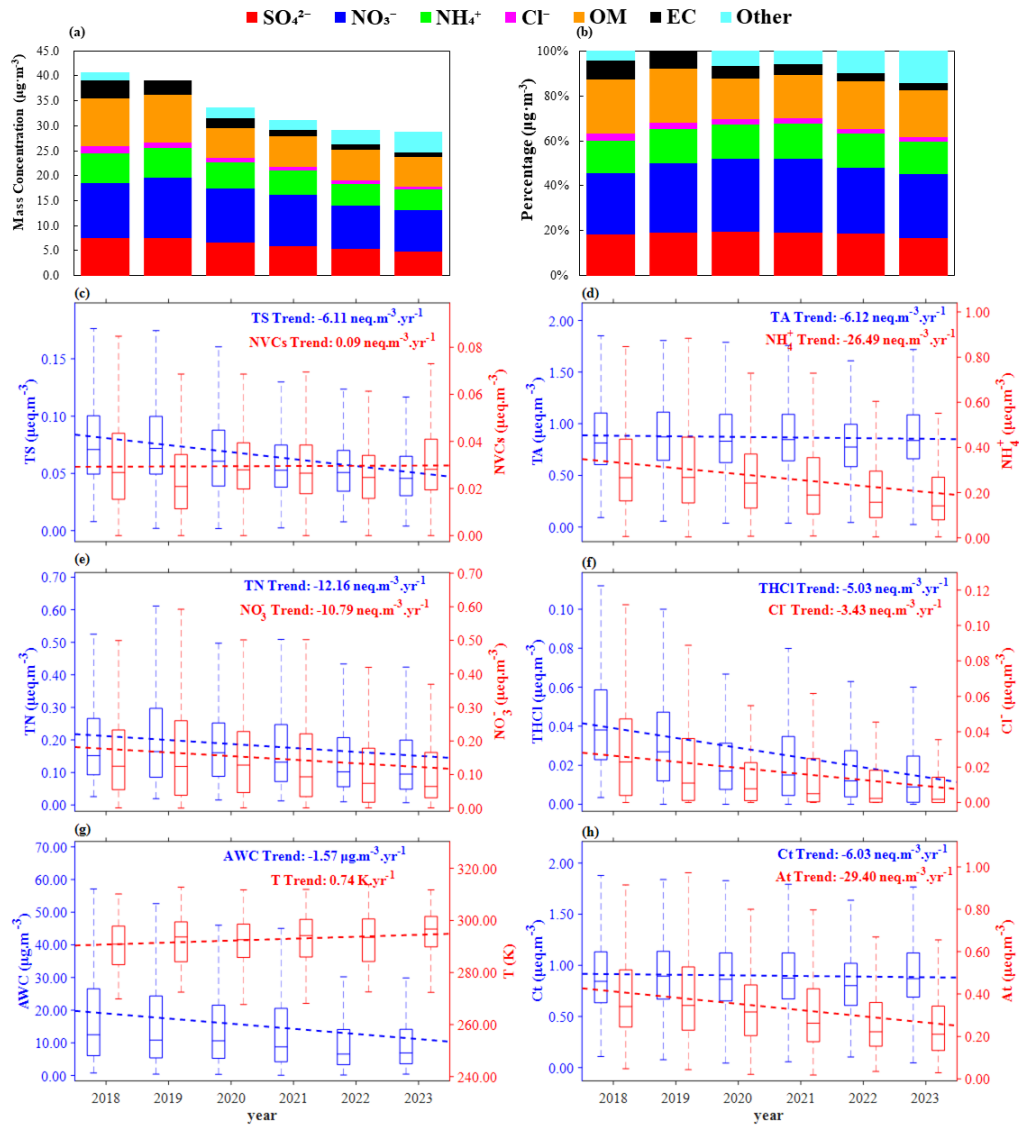

**Figure S3: Long-term trends of chemical profiles and meteorology in Changzhou, China from 2018 to 2023.**

(a) Mean mass concentrations of chemical profiles, (b) relative percentage of chemical profiles, (c) total sulfate (TS) and non-volatile cations (NVCs), (d) total ammonia (TA) and NH<sub>4</sub><sup>+</sup>, (e) total nitrate (TN) and NO<sub>3</sub><sup>-</sup>, (f) total Cl<sup>-</sup> (THCl) and Cl<sup>-</sup>, (g) AWC and T, (h) total cations (C<sub>t</sub>) and total anions (A<sub>t</sub>).

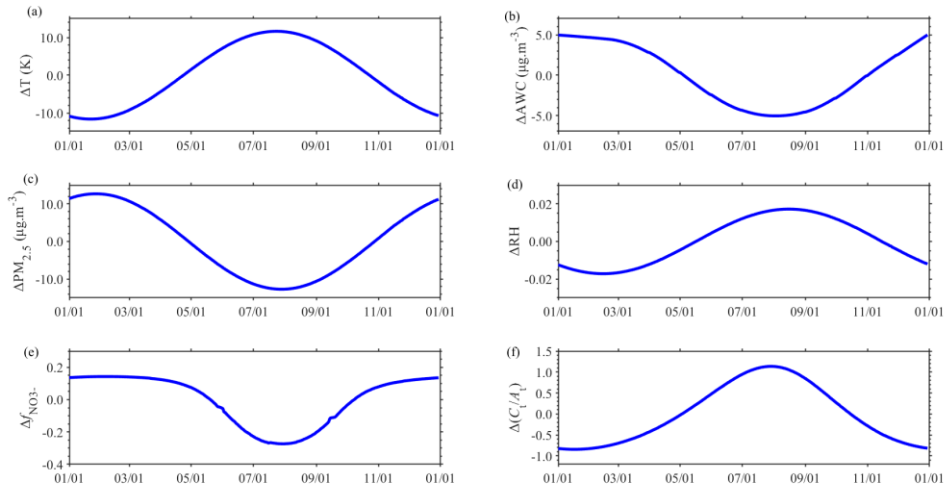

**Figure S4: Seasonal variations of (a)  $T$ , (b) AWC, (c)  $PM_{2.5}$ , (d) RH, (e)  $f_{NO_3^-}$  and (f)  $C_i/A_i$ .**

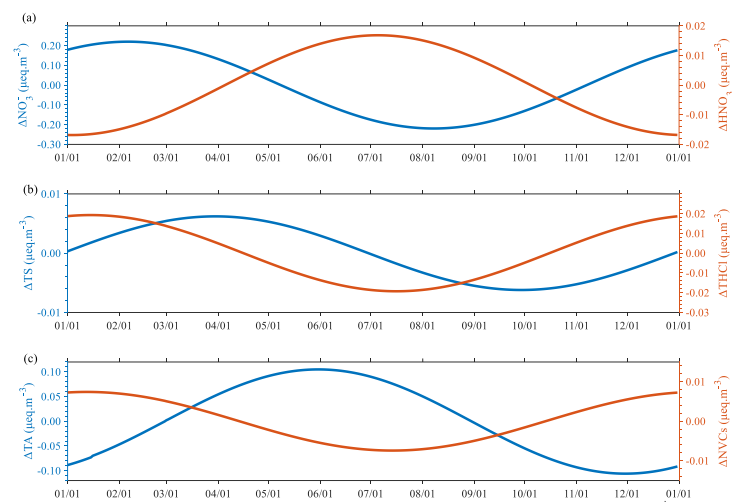

**Figure S5: Seasonal variations of (a)  $\text{NO}_3^-$  and  $\text{HNO}_3$ , (b) TS and THCl, (c) TA and NVCs.**



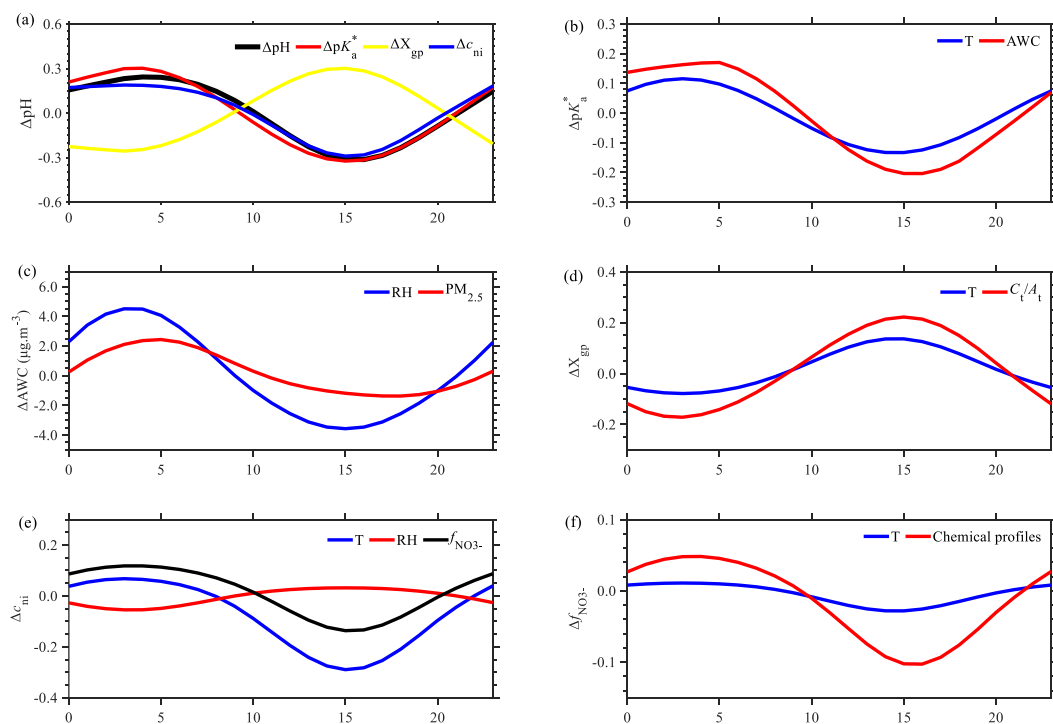

**Figure S6: Influencing factors of the diurnal variations of aerosol pH.** (a) The 1<sup>st</sup> level decomposition into  $pK_a^*$ ,  $X_{gp}$  and  $c_{ni}$ . (b)-(f) Further investigation of the influencing factors of (b)  $pK_a^*$  due to  $T$  and  $AWC$ , (c)  $AWC$  due to  $RH$  and  $PM_{2.5}$ , (d)  $X_{gp}$  due to  $C_t/A_t$  and  $T$ , (e)  $c_{ni}$  due to  $RH$ ,  $T$ ,  $f_{NO_3^-}$ , and (f)  $f_{NO_3^-}$  due to  $T$  and chemical profiles.

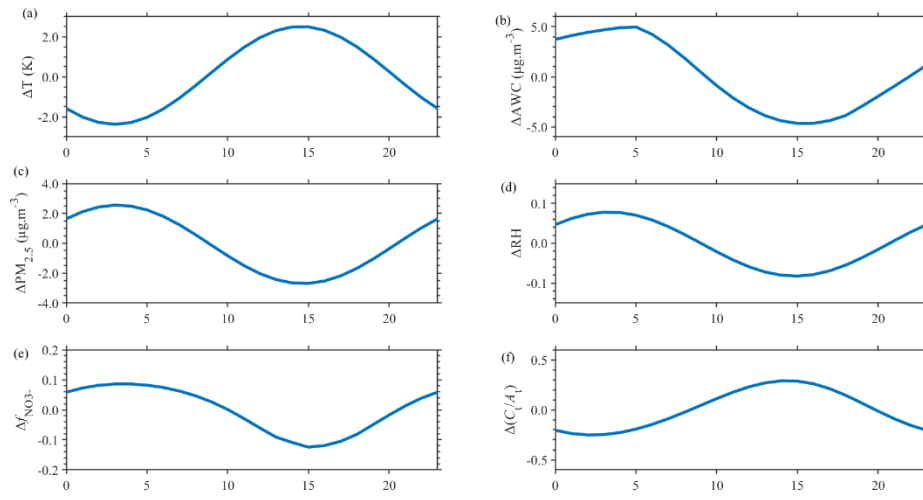

**Figure S7: Diurnal cycles of (a)  $T$ , (b) AWC, (c) PM<sub>2.5</sub>, (d) RH, (e)  $f_{\text{NO}_3^-}$  and (f)  $C/A$ .**

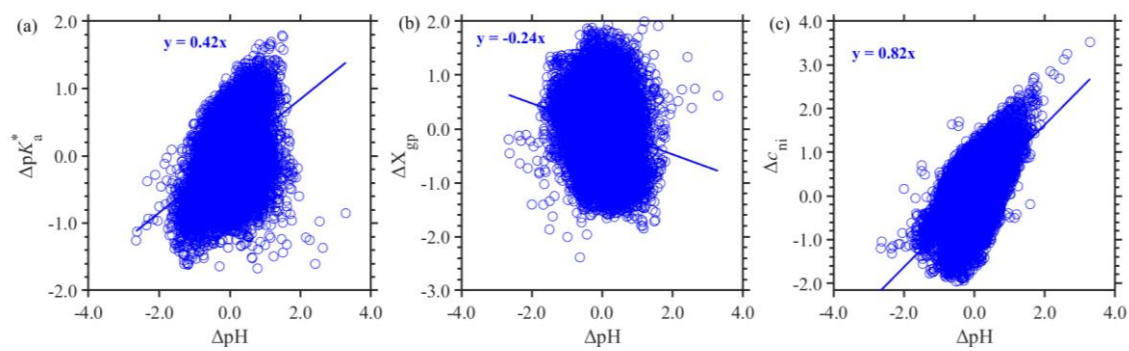

Figure S8: Top-level decomposition of random variations of pH into (a)  $\text{p}K_a^*$ , (b)  $X_{gp}$  and (c)  $c_{ni}$ .

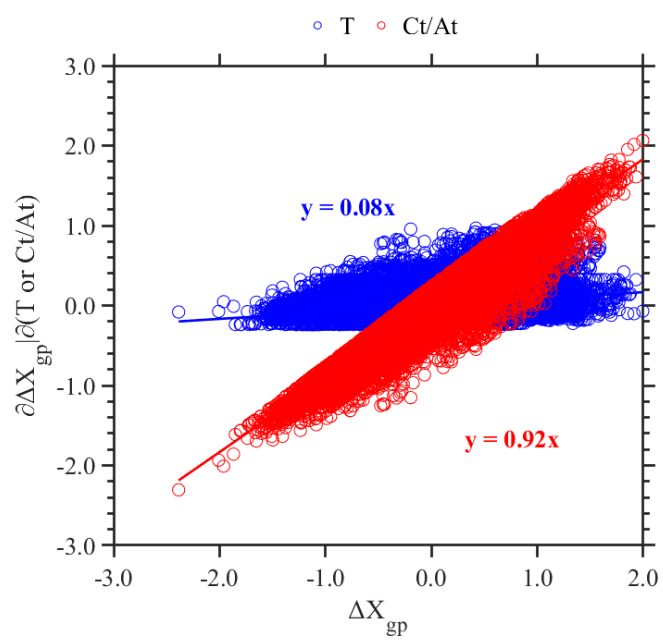

Figure S9: Random variations of  $X_{gp}$  due to  $T$  and  $Ct/At$ .

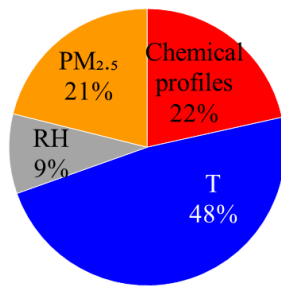

**Figure S10: Overall quantitative contribution of *T*, chemical profiles, PM<sub>2.5</sub> and RH to aerosol pH.**
